# Supplementary material for: A lung-on-chip model of early Mycobacterium tuberculosis infection reveals an essential role for alveolar epithelial cells in controlling bacterial growth
Source: eLife journal article supplement (doi:10.7554/elife.59961), 2020-11-23

# Normal Surfactant - 1 day at air-liquid interface

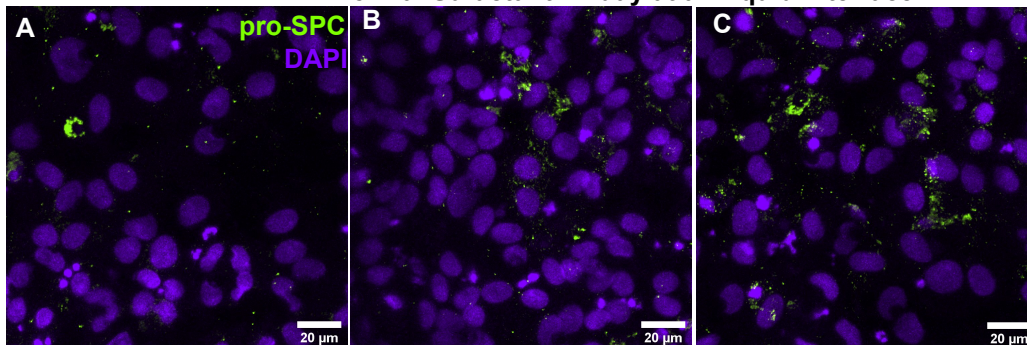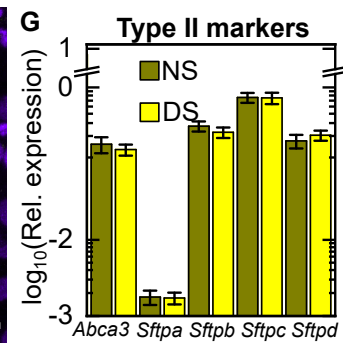

# Deficient Surfactant - 1 day at air-liquid interface

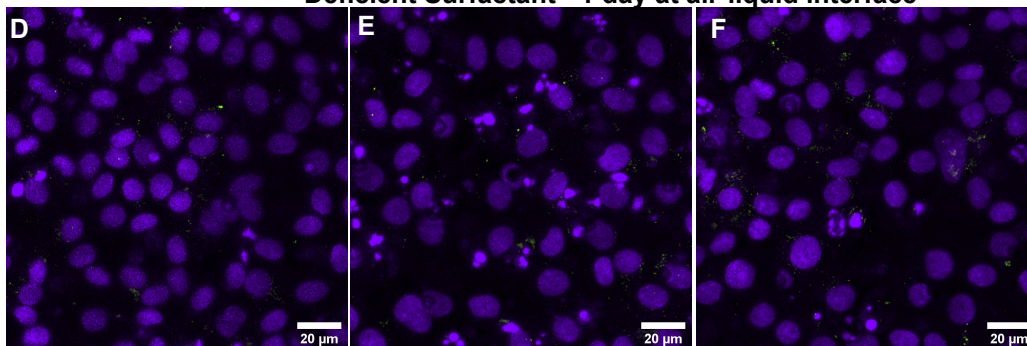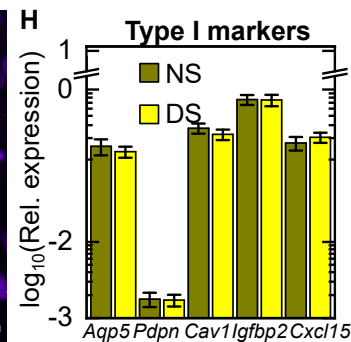

# 6 days at air-liquid interface

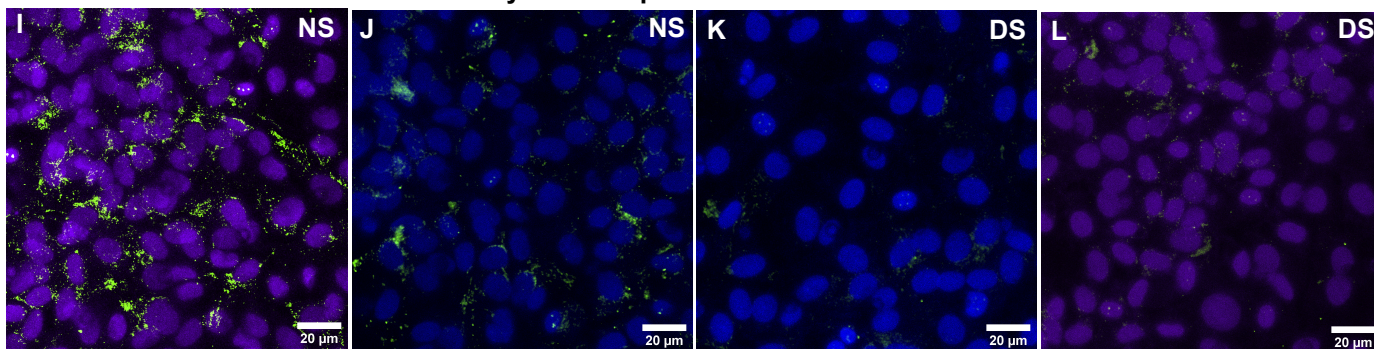

Supplement: supp [file elife-59961-supp-v1.zip]
