# Supplementary figures and images for: A lung-on-chip model of early Mycobacterium tuberculosis infection reveals an essential role for alveolar epithelial cells in controlling bacterial growth
Source: eLife journal article supplement (doi:10.7554/elife.59961), 2020-11-23

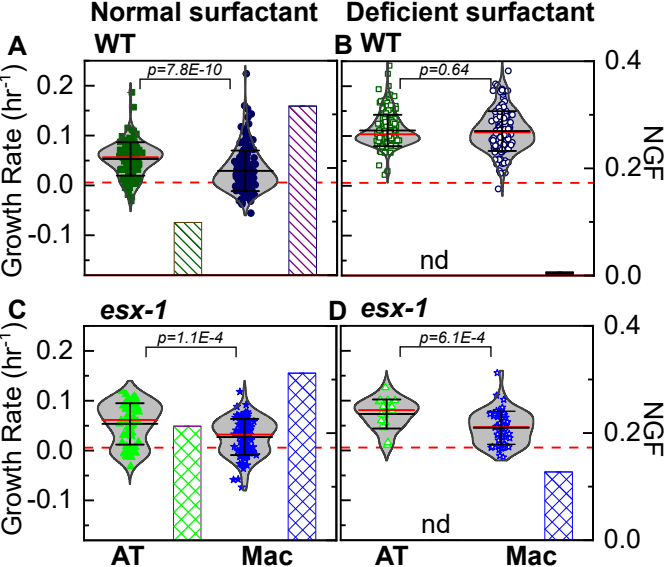

Supplement: supp [file elife-59961-supp-v1.zip]

# *In vivo* - 8 dpi

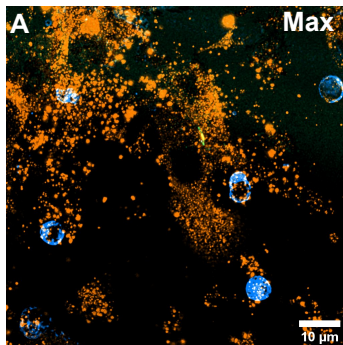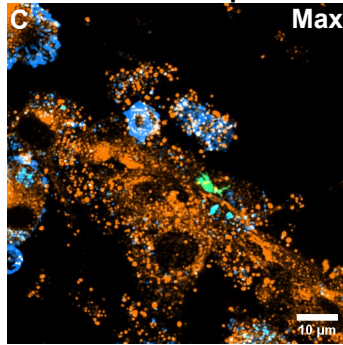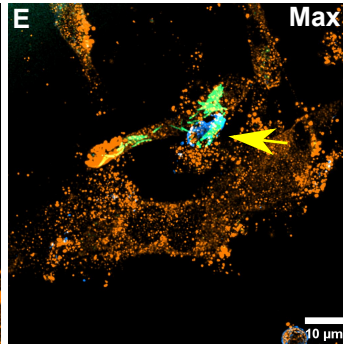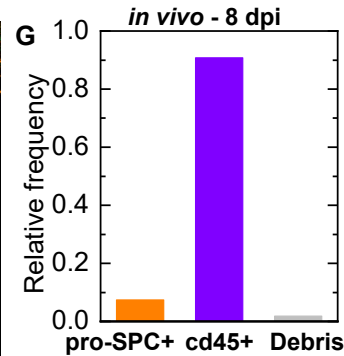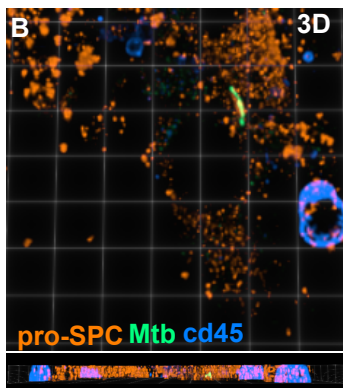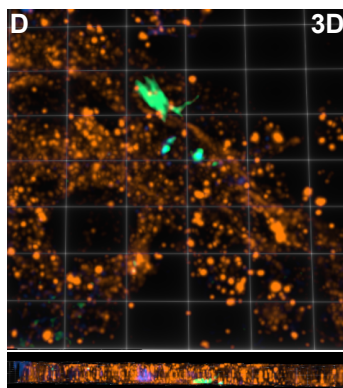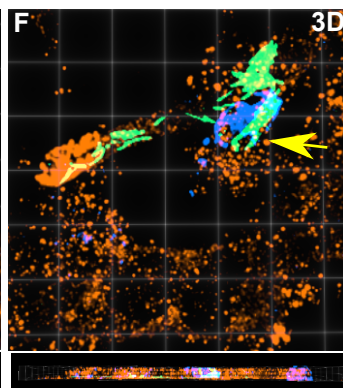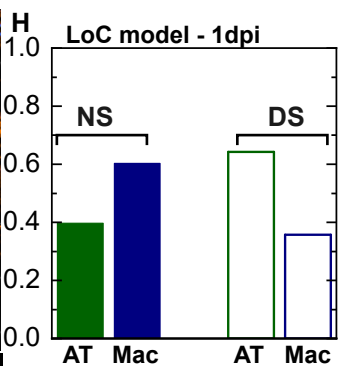

Supplement: supp [file elife-59961-supp-v1.zip]

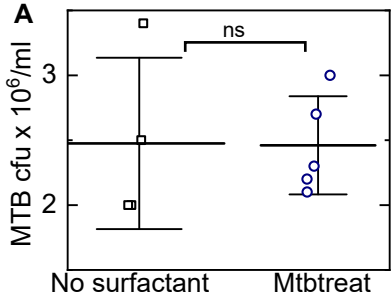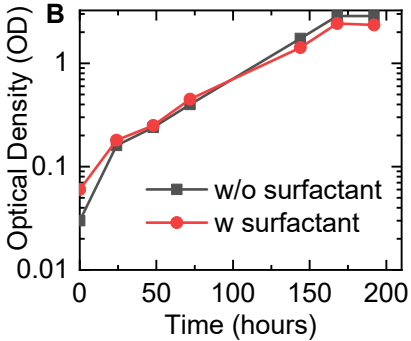

Supplement: supp [file elife-59961-supp-v1.zip]

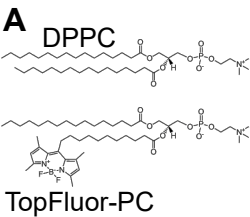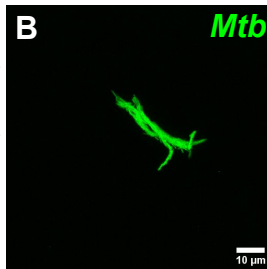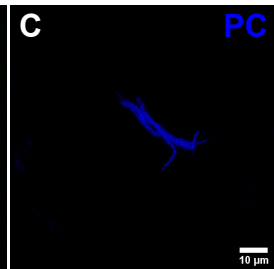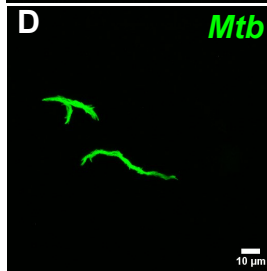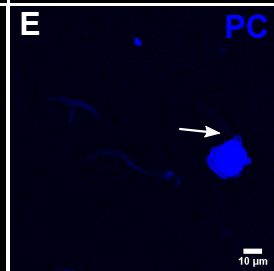

Supplement: supp [file elife-59961-supp-v1.zip]

PDIM A

PDIM B

TAG

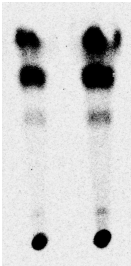

WT

*esx-1*

Supplement: supp [file elife-59961-supp-v1.zip]

**A NS**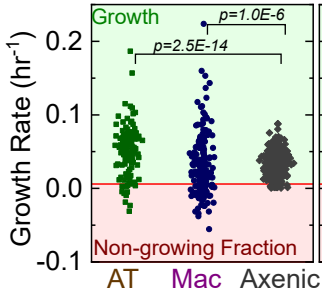**B DS**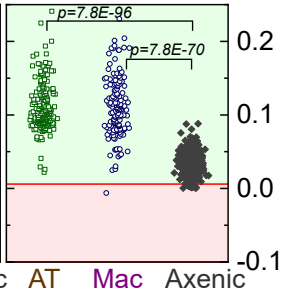

Supplement: supp [file elife-59961-supp-v1.zip]

## Widefield Microscopy

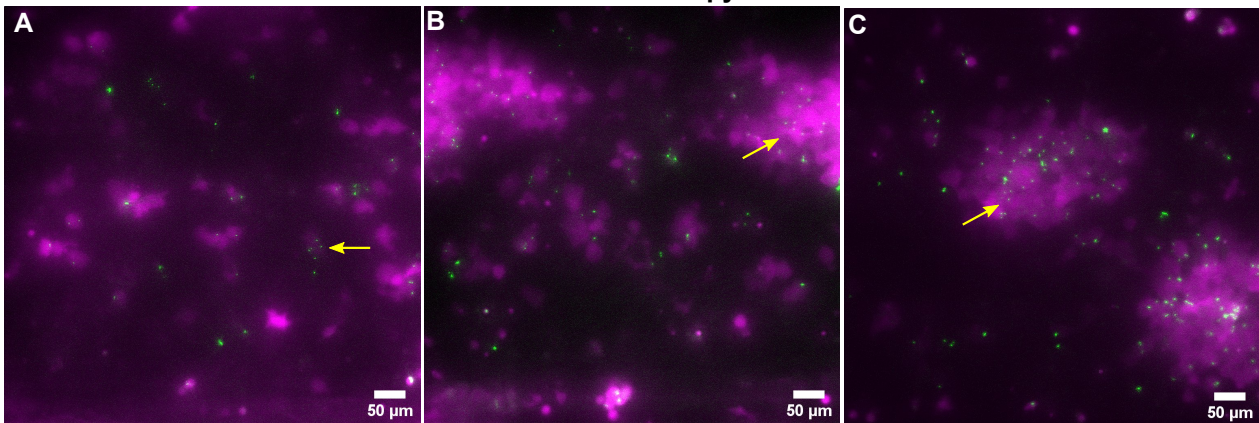

## Confocal Microscopy - 3D view

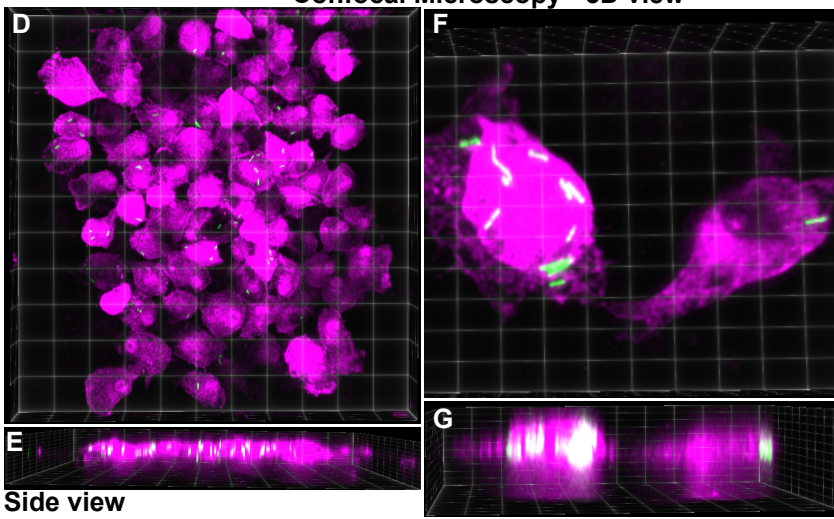

Supplement: supp [file elife-59961-supp-v1.zip]

**A** Relative expression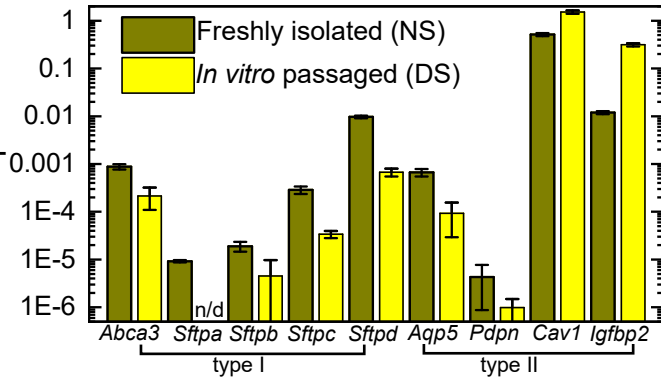**B**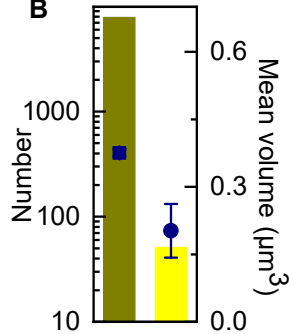**C**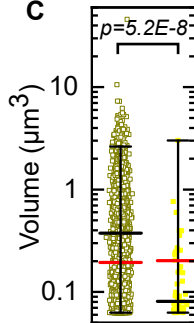

Supplement: supp [file elife-59961-supp-v1.zip]

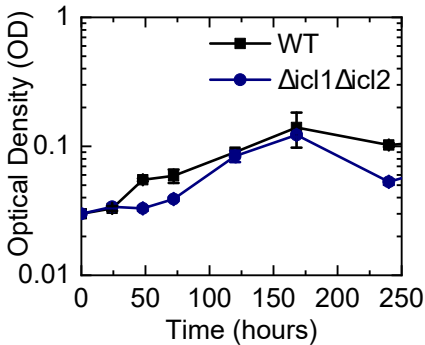

Supplement: supp [file elife-59961-supp-v1.zip]

# A Normal surfactant

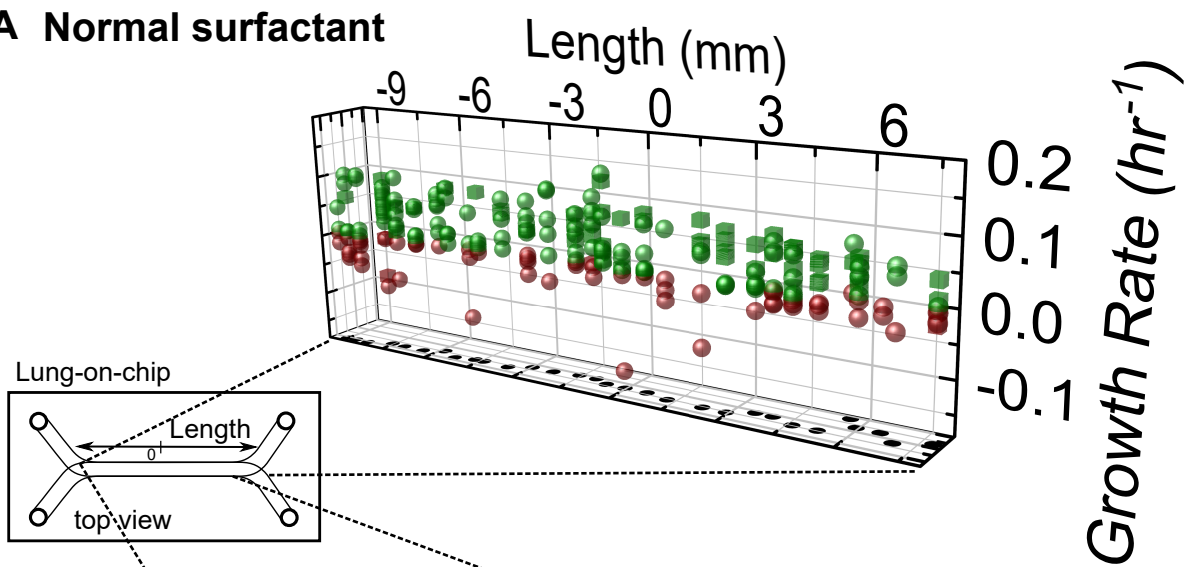

# B

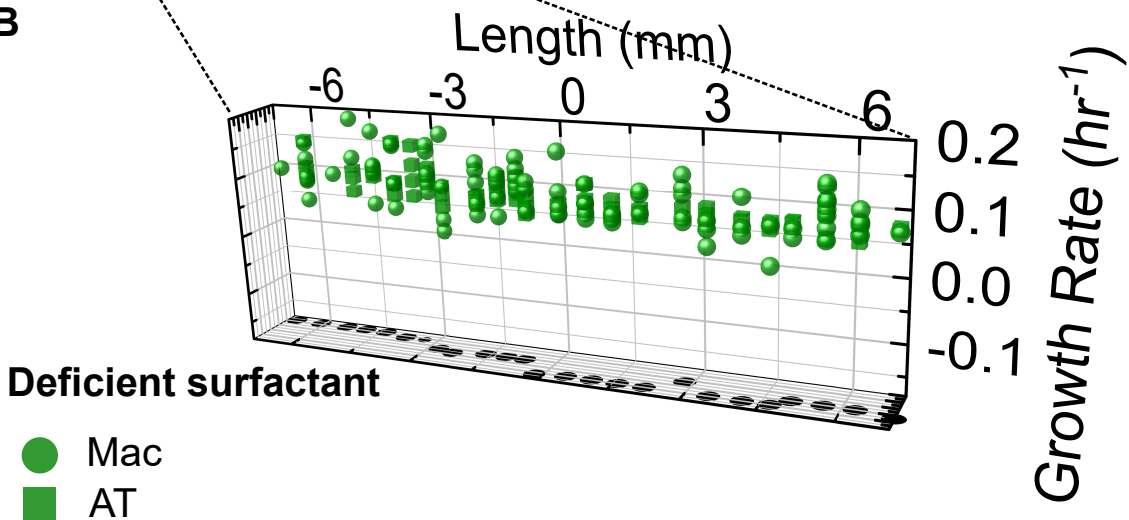

Supplement: supp [file elife-59961-supp-v1.zip]

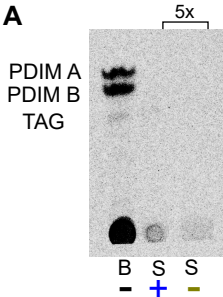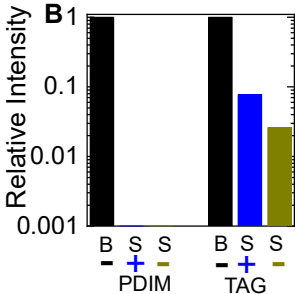

Supplement: supp [file elife-59961-supp-v1.zip]
